# Supplementary material for: A biocompatible macromolecular two-photon initiator based on hyaluronan
Source: PubMed Central journal article supplement (PMC5310395; doi:10.1039/c6py01787h), 2016-11-29
Supplement: PY-008-C6PY01787H-s001.pdf [file PY-008-C6PY01787H-s001.pdf]

# Electronic Supplementary Information for

## Biocompatible macromolecular two-photon initiator based on hyaluronan

(3*E*,5*E*)-*N*-[3,5-bis[[4-(dimethylamino)phenyl]methylene]-4-oxocyclohexyl]-  
carbamic acid 1,1-dimethylethyl ester (Boc-MCNK)

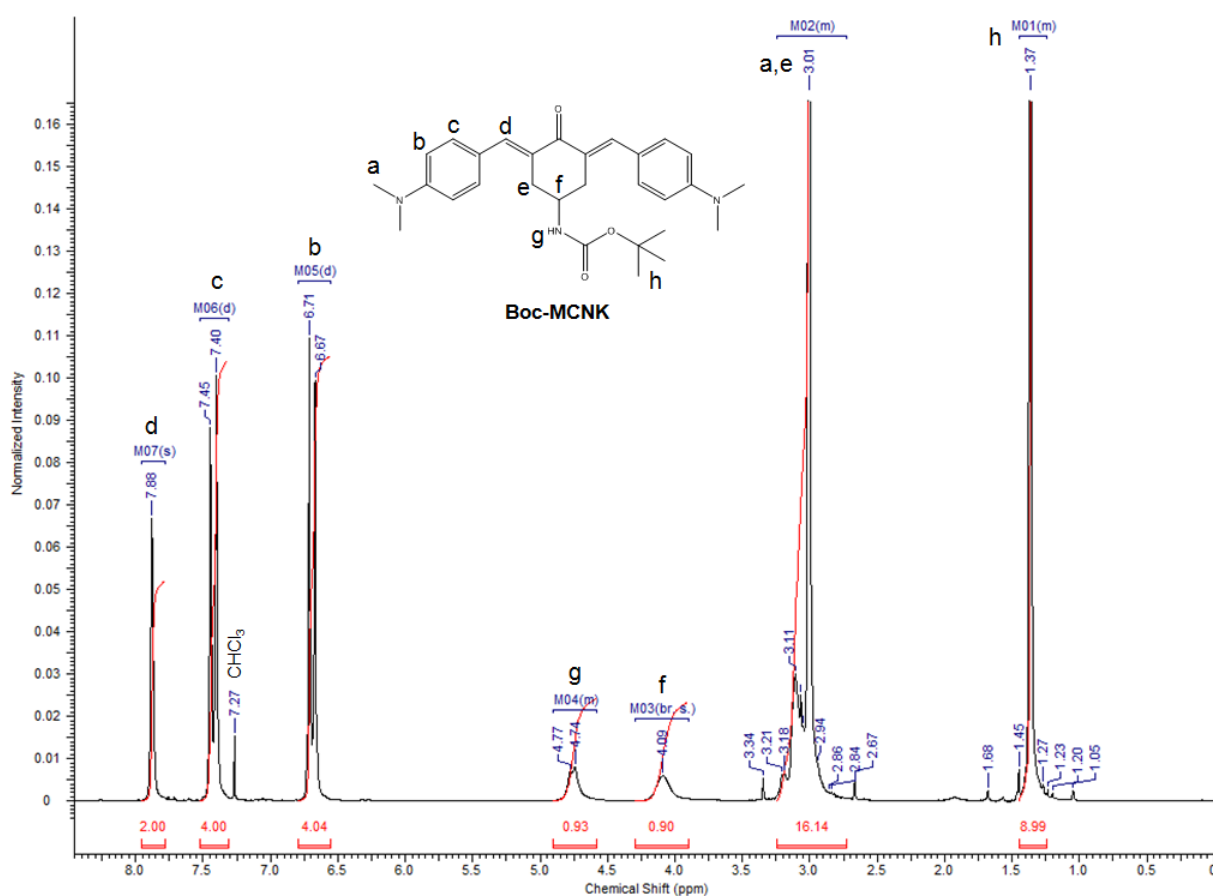

Fig. S1: <sup>1</sup>H NMR of Boc-MCNK

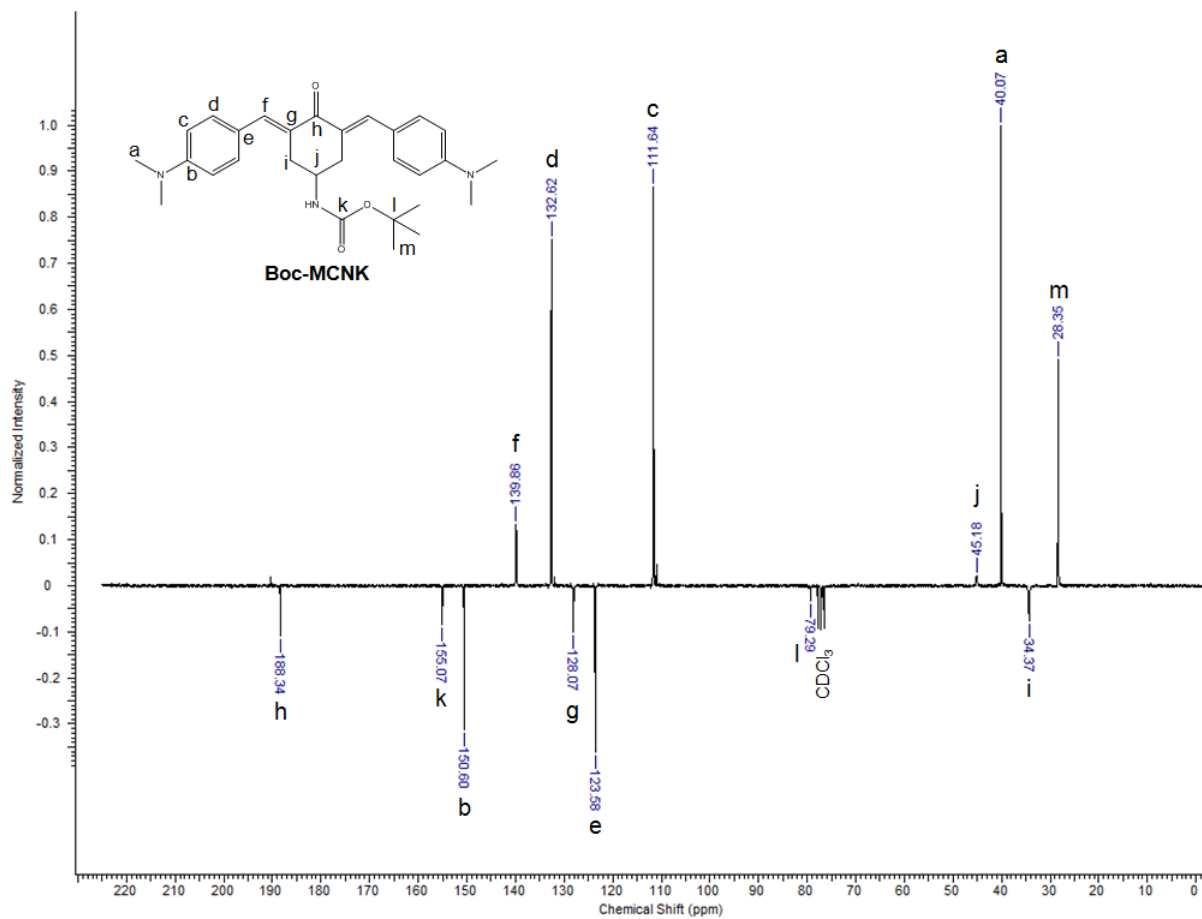

**Fig. S2:** <sup>13</sup>C APT NMR of **Boc-MCNK**

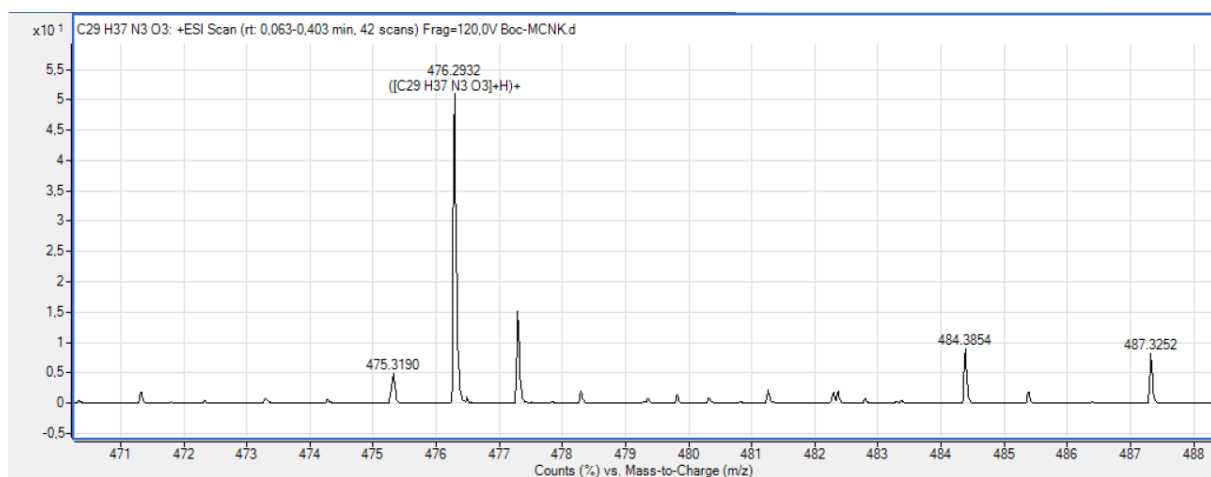

**Fig. S3:** HRMS showing  $[M+H]^+$ -peak of **Boc-MCNK**

(2*E*,6*E*)-4-amino-2,6-bis[[4-(dimethylamino)phenyl]methylene]cyclohexanone  
(MCNK)

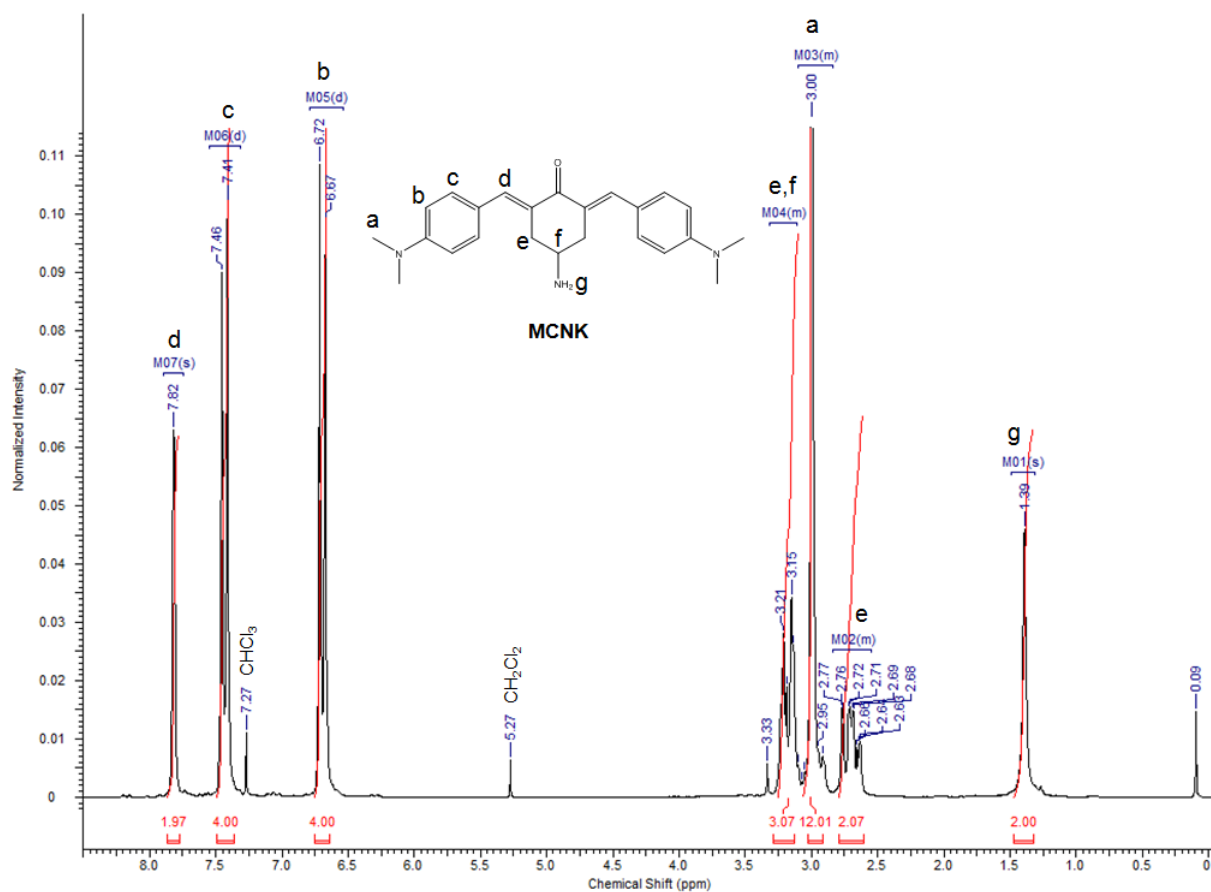

Fig. S4: <sup>1</sup>H NMR of MCNK

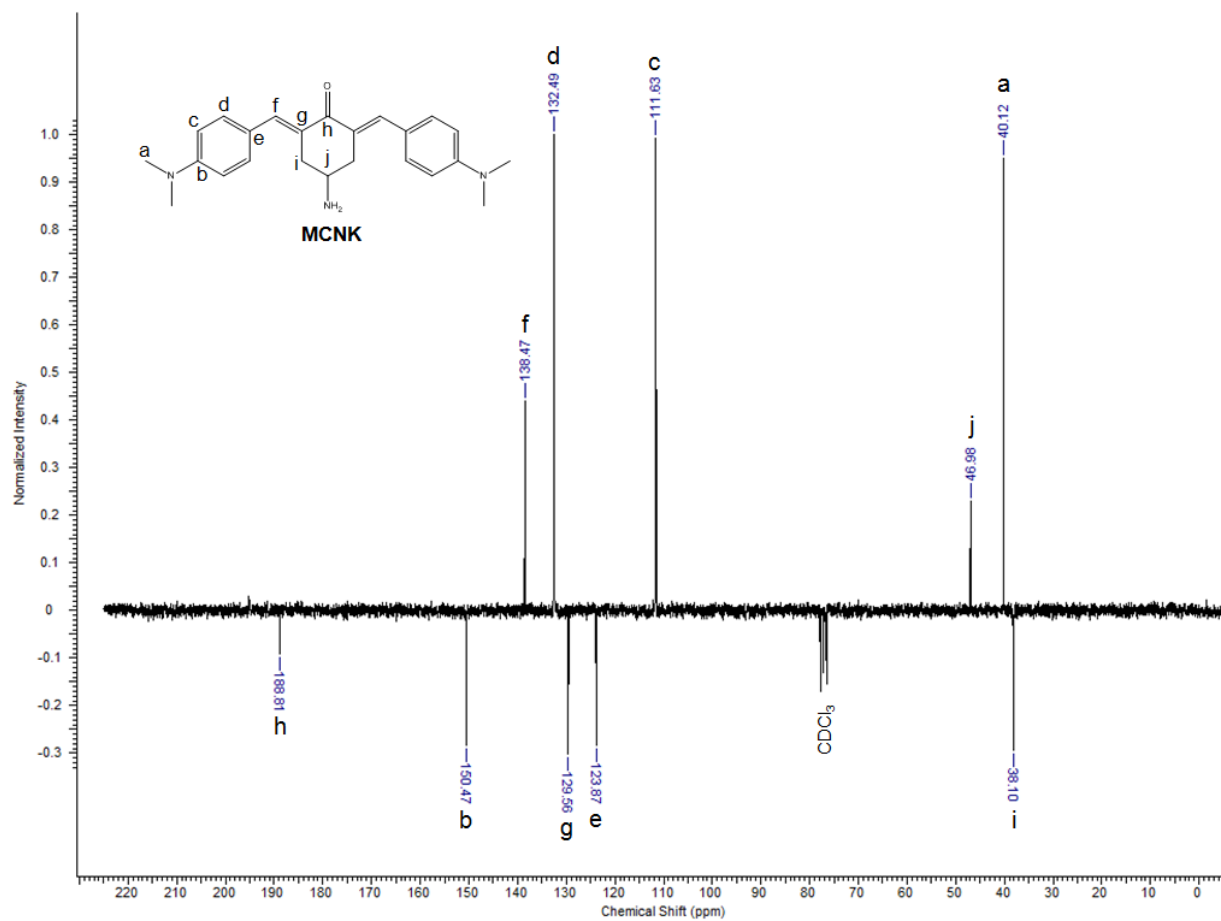

Fig. S5:  $^{13}\text{C}$  APT NMR of MCNK

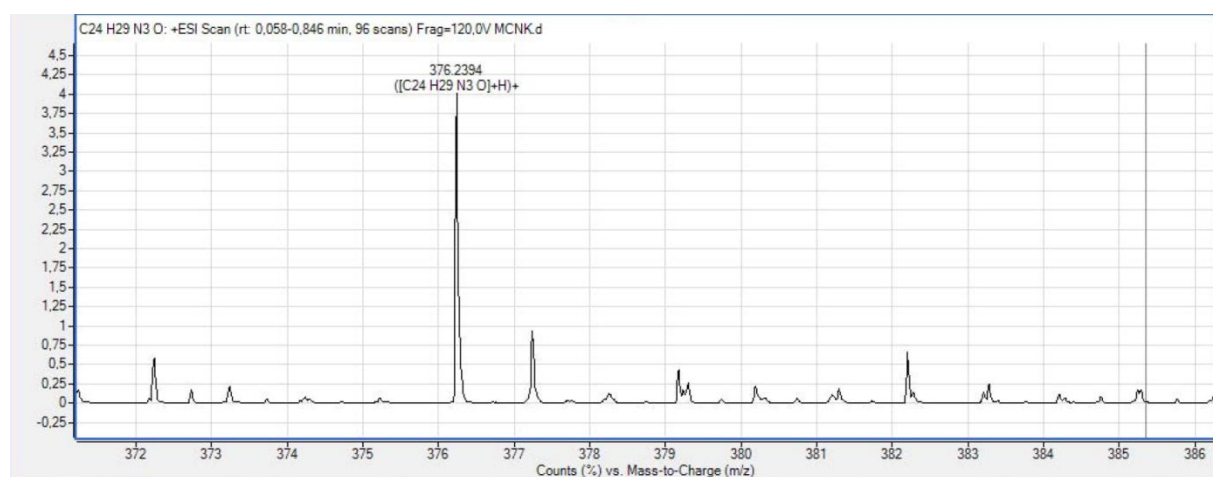

Fig. S6: HRMS showing  $[\text{M}+\text{H}]^+$ -peak of MCNK

(3E,5E)-N-[4-[[3,5-bis[[4-(dimethylamino)phenyl]methylene]-4-oxocyclohexyl]amino]-4-oxobutyl]carbamic acid 1,1-dimethylethyl ester (Boc-MGABA)

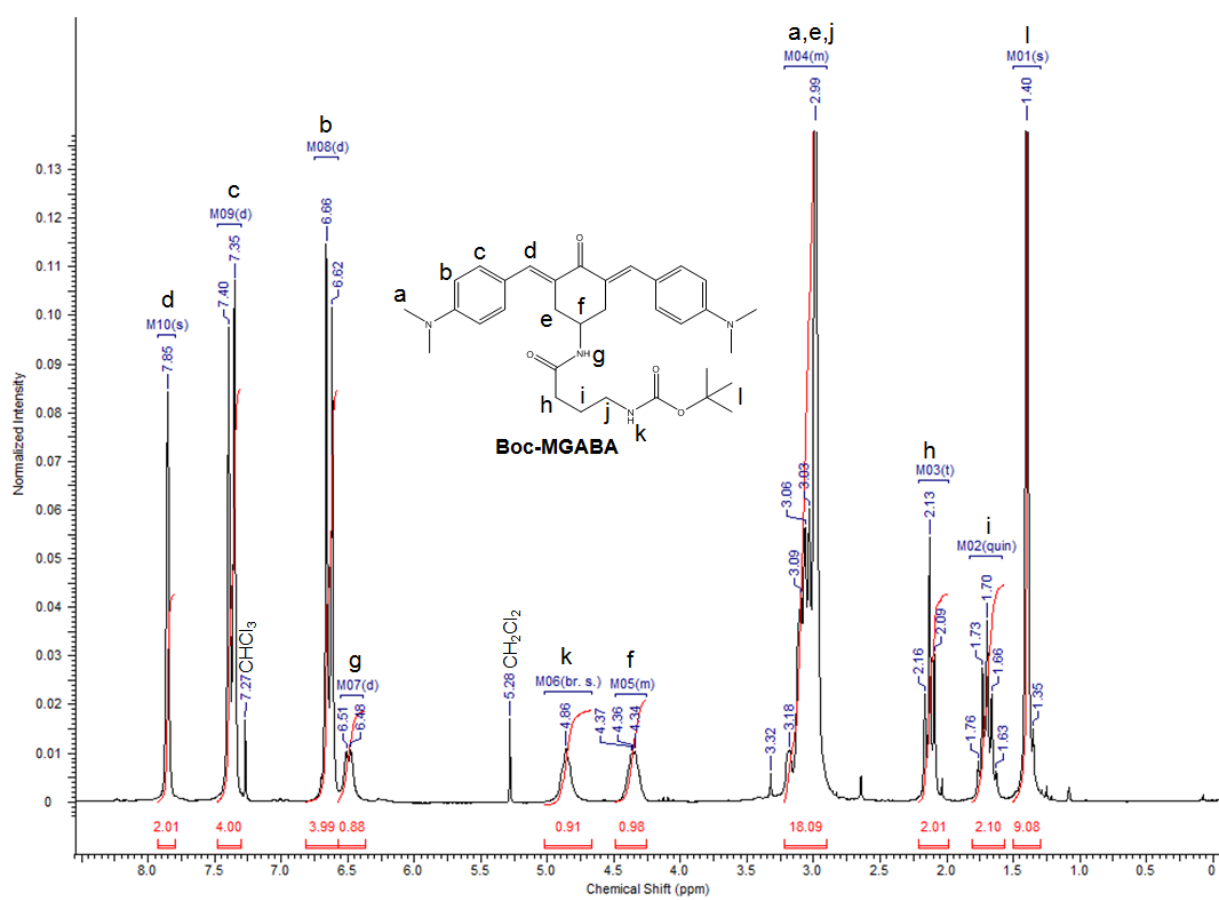

Fig. S7: <sup>1</sup>H NMR of Boc-MGABA

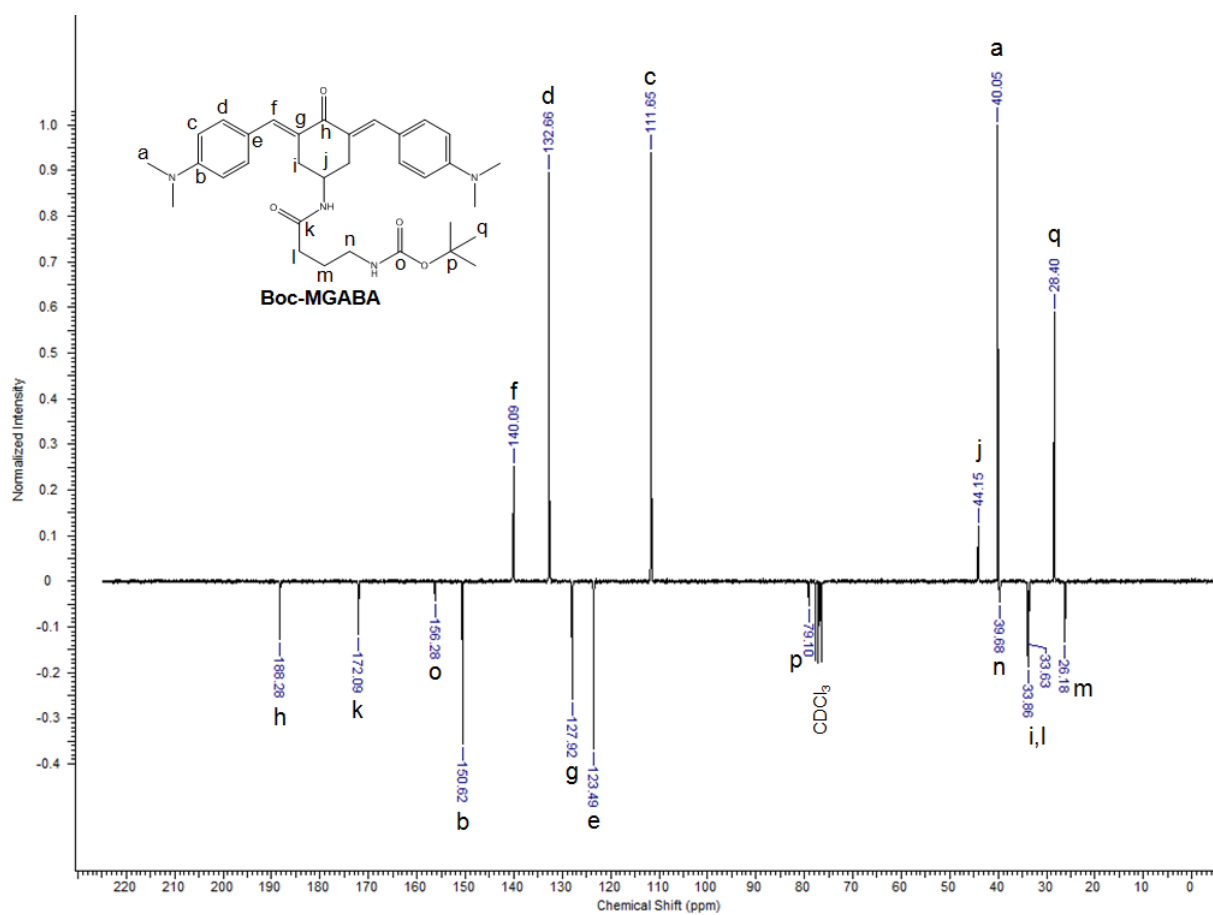

**Fig. S8:** <sup>13</sup>C NMR of Boc-MGABA

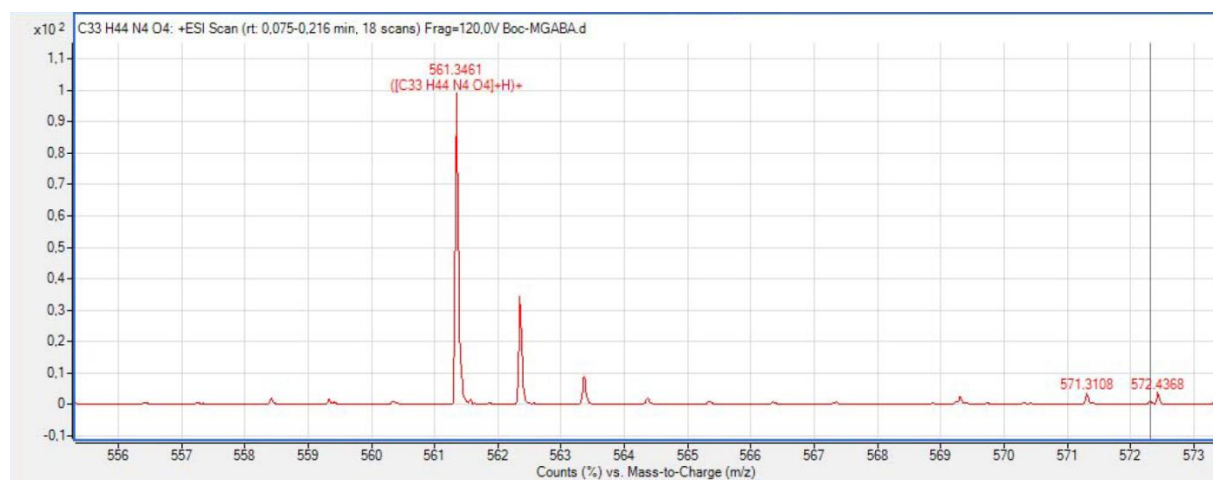

**Fig. S9:** HRMS showing [M+H]<sup>+</sup>-peak of Boc-MGABA

(3E,5E)-4-amino-N-[3,5-bis[[4-(dimethylamino)phenyl]methylene]-4-oxocyclohexyl]butanamide (MGABA)

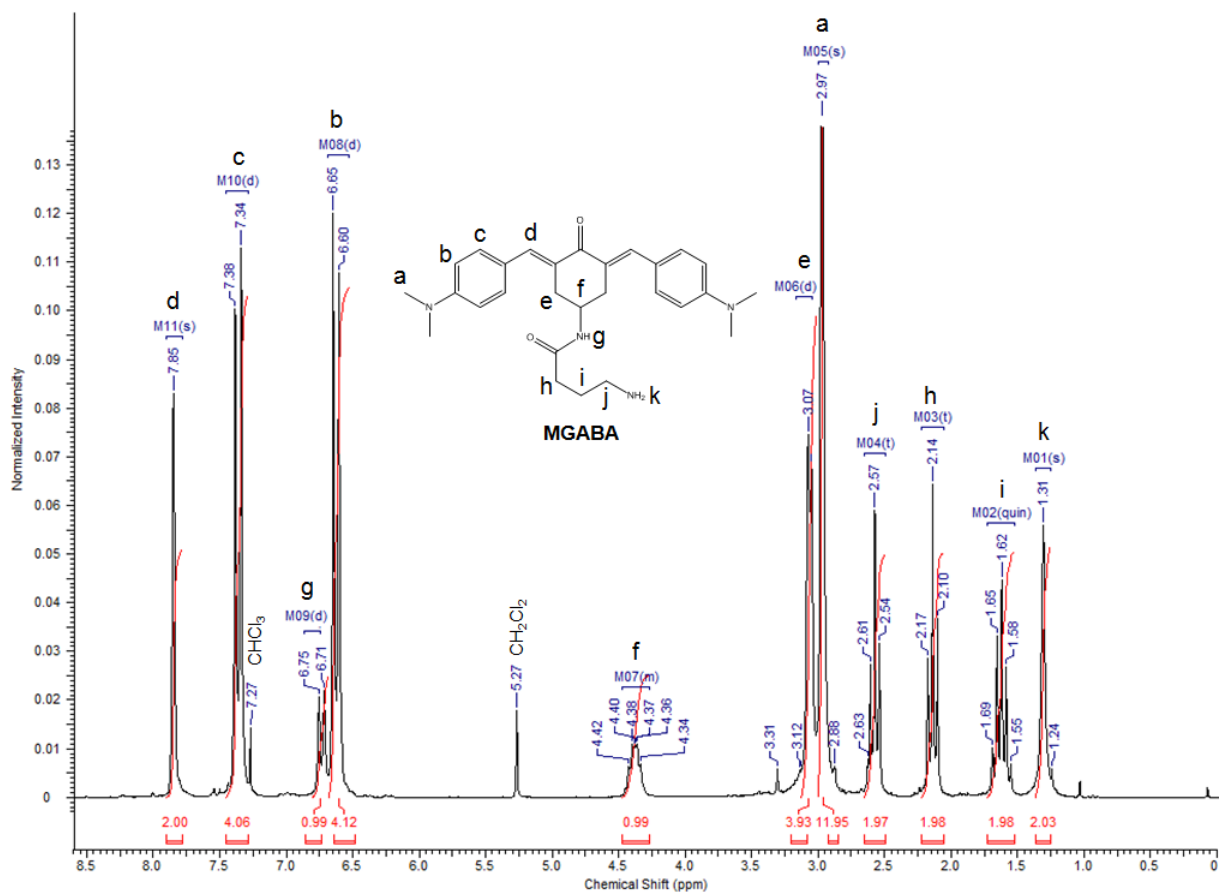

Fig. S10: <sup>1</sup>H NMR of MGABA

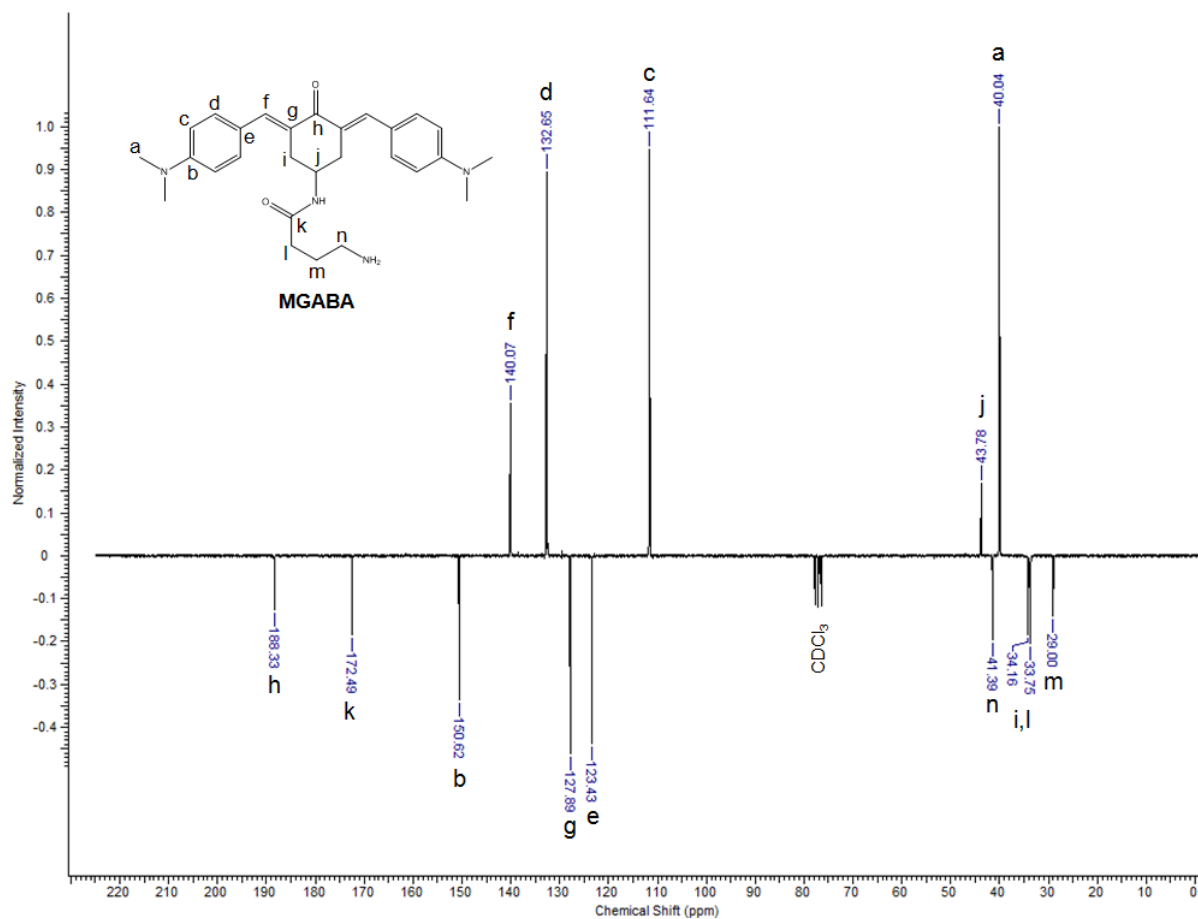

**Fig. S11:** <sup>13</sup>C APT NMR of **MGABA**

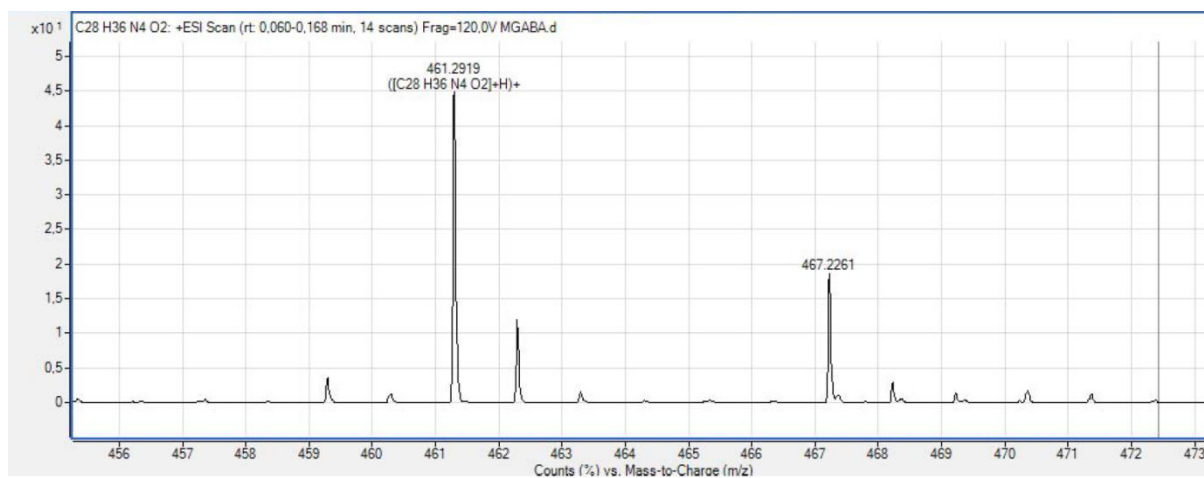

**Fig. S12:** HRMS showing  $[M+H]^+$ -peak of **MGABA**



## Hyaluronan-based photoinitiator (HAPI)

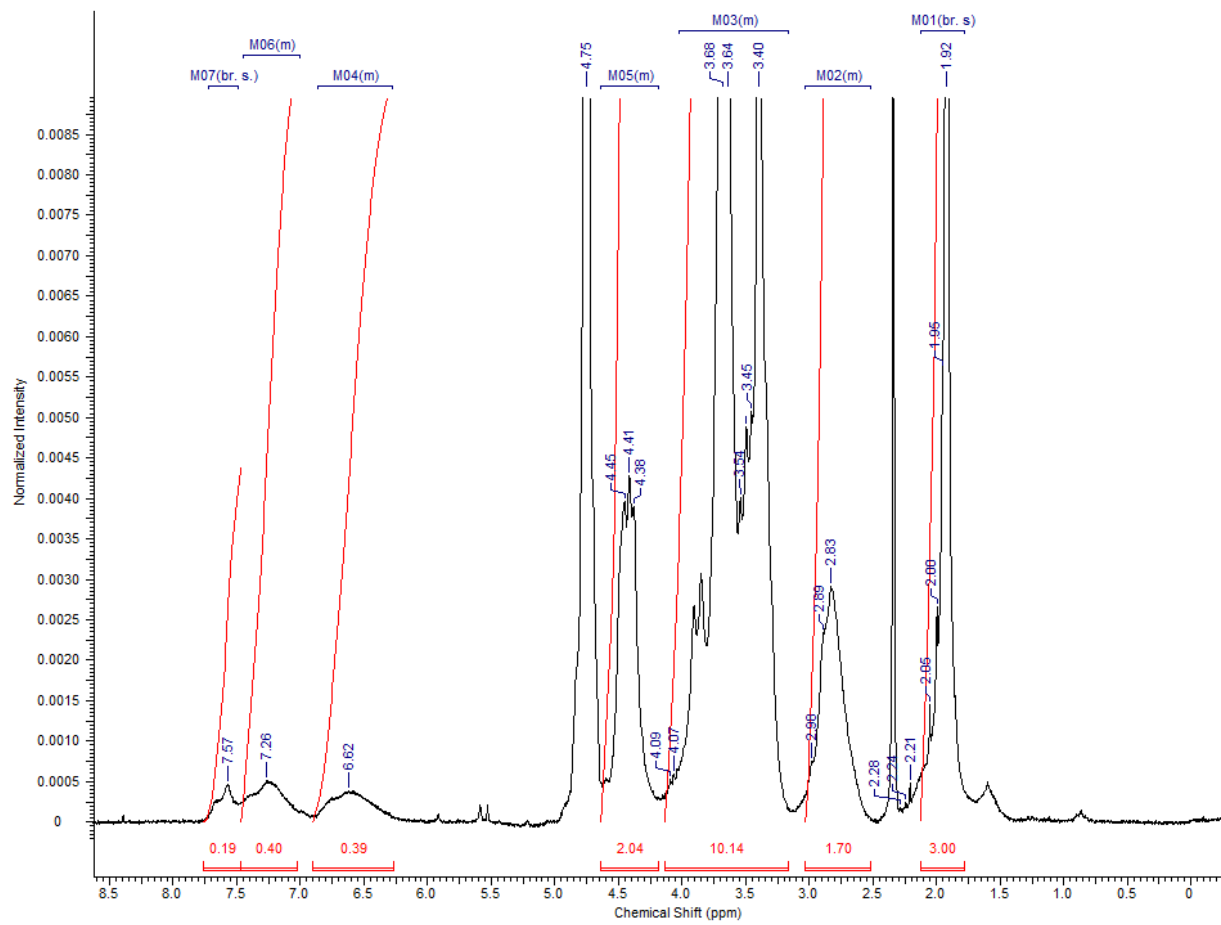

Fig. S13:  $^1\text{H}$  NMR of HAPI

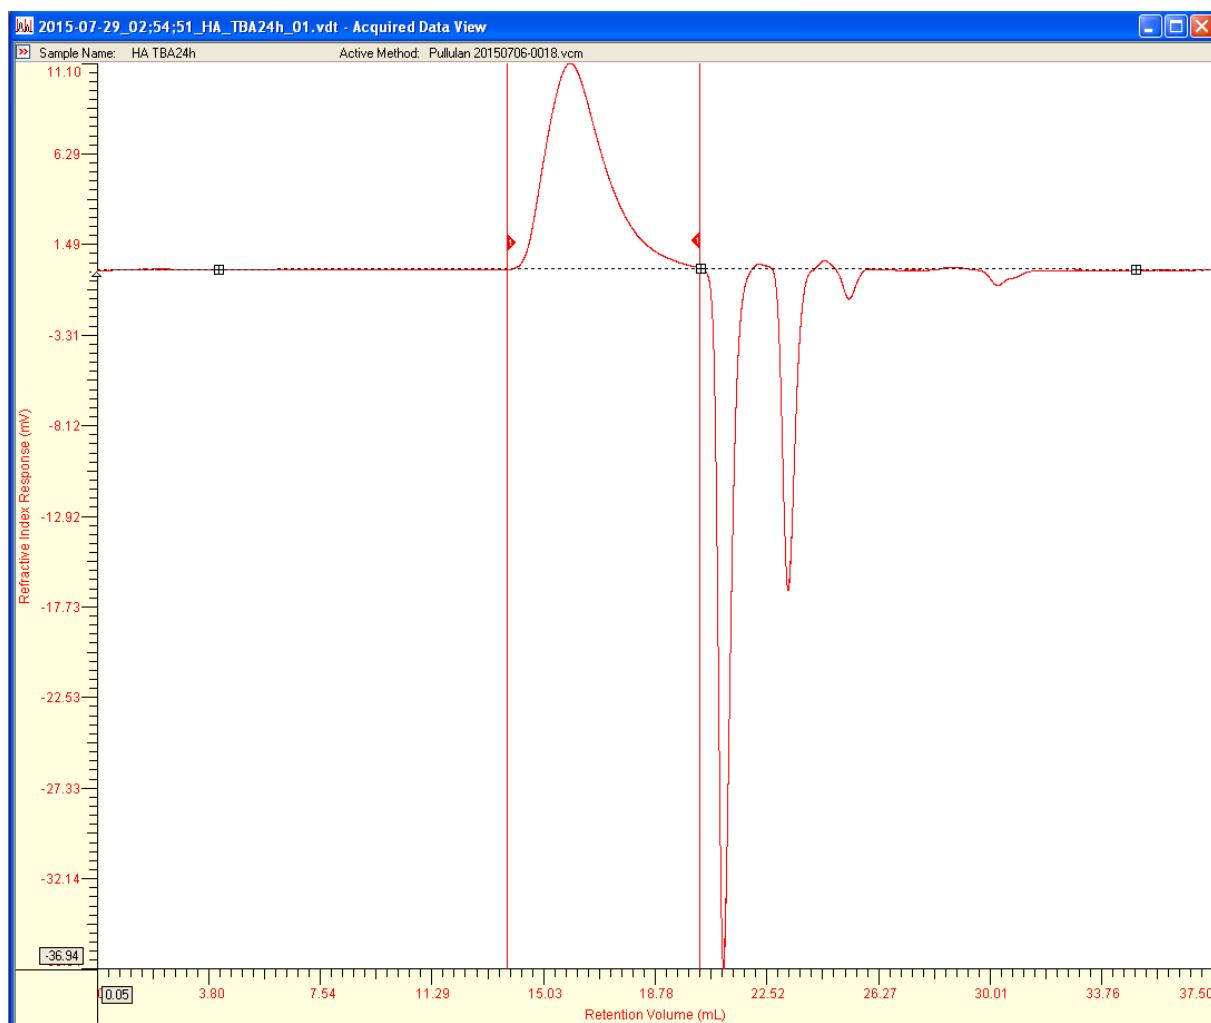

**Fig. S14:** GPC data of hydrolysed hyaluronan used in synthesis of **HAPI**

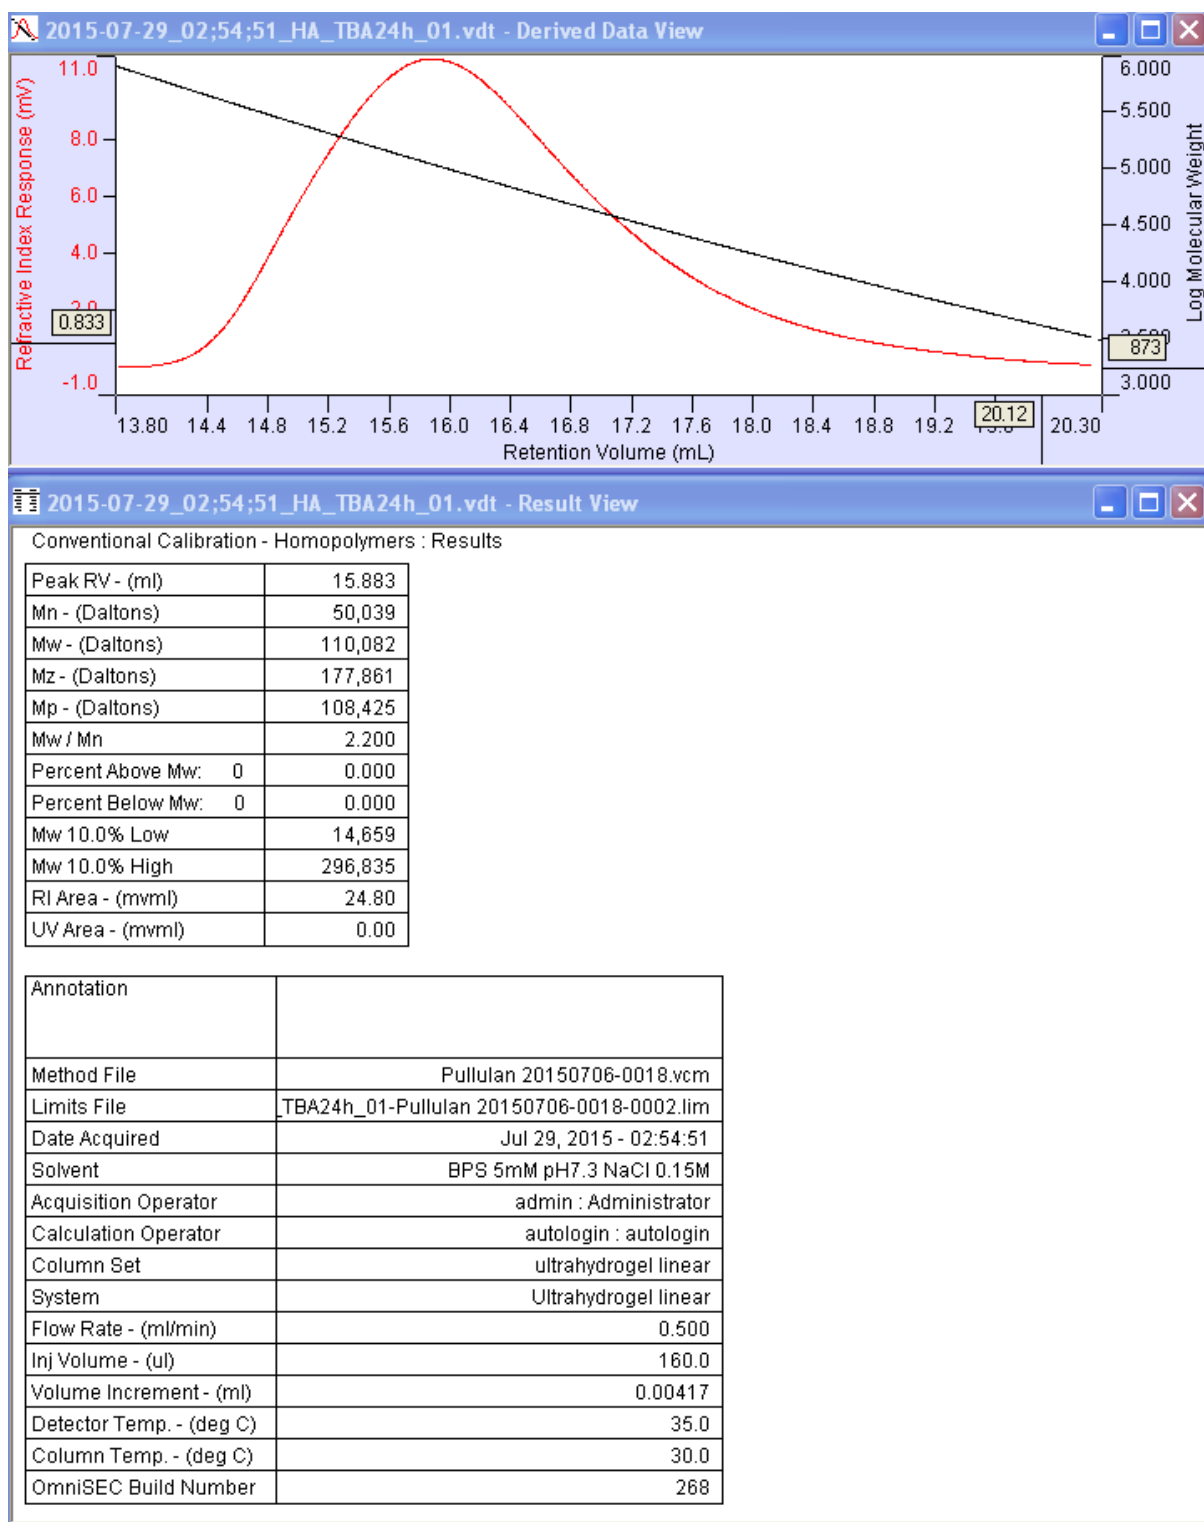

**Fig. S15:** GPC data of hydrolysed hyaluronan used in synthesis of HAPI
